# Supplementary material
Source: publisher figshare collection journal article supplement (https://sage.figshare.com/ndownloader/files/18232361)
Supplement: Supplementary file 1 [file 18232361]

## Sheet: Sheet1
Figure S1. Study members with more persistent cannabis dependence exhibited larger social class decline than members with no dependence: Childhood and adulthood social class by persistence of cannabis dependence. (Error bars = SEs)1
1Estimates are observed means. In a model adjusting for sex, European ancestry, proportion of first-degree relatives with substance dependence, low childhood self-control, childhood IQ, and adolescent psychopathology (major depressive disorder and conduct disorder), Study members who were from lower childhood social class did not experience more persistent cannabis dependence in adulthood than me…
